# Supplementary material for: Selectivity controlled synthesis of furan-ring nitrogenous compounds from 5-hydroxymethylfurfural, ammonia and hydrogen peroxide
Source: Royal Society of Chemistry journal article supplement (doi:10.1039/d3cy01682j), 2024-01-01
Supplement: d3cy01682j1.pdf [file d3cy01682j1.pdf]

## Electronic Supplementary Information

### Selectivity controlled synthesis of furan-ring nitrogenous compounds from 5-hydroxymethylfurfural, ammonia and hydrogen peroxide

Xuan Gao <sup>a</sup>, Zhihui Li <sup>\* a, b</sup>, Dongsheng Zhang <sup>a</sup>, Xinqiang Zhao <sup>a</sup>, and Yanji Wang <sup>\* a</sup>

a. Hebei Provincial Key Lab of Green Chemical Technology and High Efficient Energy Saving, Hebei University of Technology, Tianjin 300130, China

b. School of Energy and Environmental Engineering, Hebei University of Technology, Tianjin 300130, China

\*E-mail: yjwang@hebut.edu.cn (Yanji Wang);

\*E-mail: lizhihui425@hebut.edu.cn (Zhihui Li)

#### Contents

|                                                                                                       |      |
|-------------------------------------------------------------------------------------------------------|------|
| The quantitative formulae for the HMF ammoxidation                                                    | S2   |
| Fig. S1 GC-MS spectra of products                                                                     | S3   |
| Fig. S2 GC spectra of products                                                                        | S4   |
| Fig. S3 FT-IR spectra of products                                                                     | S5   |
| Fig. S4-9 NMR spectra of products                                                                     | S7-9 |
| Fig. S10 XRD patterns of fresh and used Cu(OAc) <sub>2</sub> /TS-1                                    | S10  |
| Fig. S11 FT-TR spectra of the fresh and used Cu(OAc) <sub>2</sub> /TS-1                               | S11  |
| Fig. S12 Pore size distribution of Cu(OAc) <sub>2</sub> /TS-1 and TS-1                                | S12  |
| Table S1 Catalytic performance for the synthesis of HMFA from HMFO over 10%Cu(OAc) <sub>2</sub> /TS-1 | S13  |

|                                                                                          |     |
|------------------------------------------------------------------------------------------|-----|
| Table S2 The physicochemical property of Cu(OAc) <sub>2</sub> /TS-1 and TS-1             | S14 |
| Table S3 ICP results and catalytic activity of 10%Cu(OAc) <sub>2</sub> /TS-1             | S15 |
| Table S4 Reaction performance comparison of different methods for the synthesis of HMFC. | S16 |

## 1. The quantitative formulae for the HMF ammoxidation

The formula for calculating HMF conversion, HMFO conversion, as well as HMFO, HMFC and HMFA yields are provided as follows:

$$\text{HMF conversion} = 1 - \frac{\text{moles of HMF remained}}{\text{moles of HMF in the feed}} \times 100\% \quad (1)$$

$$\text{HMFO yield} = \frac{\text{moles of HMFO produced}}{\text{moles of HMF in the feed}} \times 100\% \quad (2)$$

$$\text{HMFO conversion} = 1 - \frac{\text{moles of HMFO remained}}{\text{moles of HMFO in the feed}} \times 100\% \quad (3)$$

$$\text{HMFC yield} = \frac{\text{moles of HMFC produced}}{\text{moles of HMFO in the feed}} \times 100\% \quad (4)$$

$$\text{HMFA yield} = \frac{\text{moles of HMFA produced}}{\text{moles of HMFO in the feed}} \times 100\% \quad (5)$$

## 2. GC-MS spectra of products

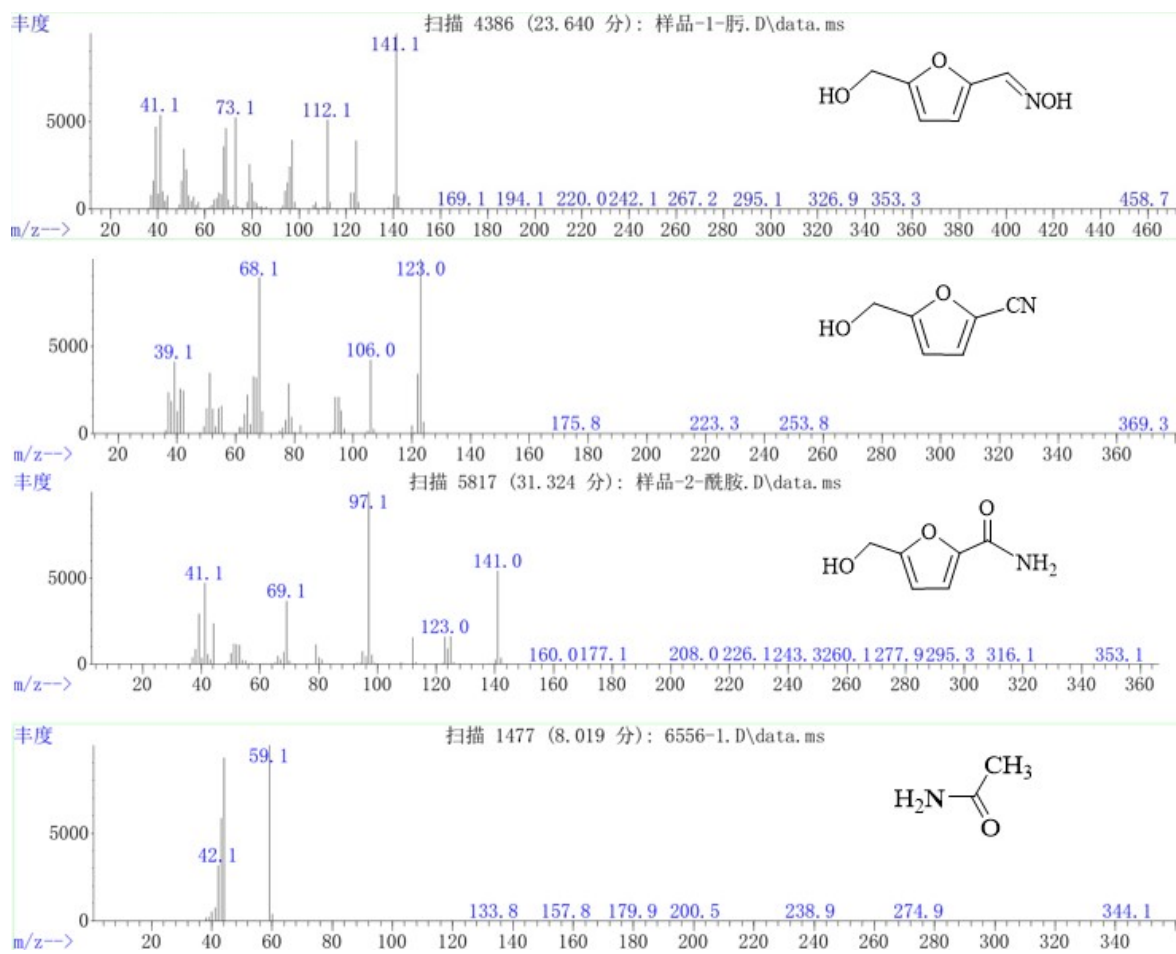

Fig. S1 GC-MS spectra of products.

### 3. GC spectra of products

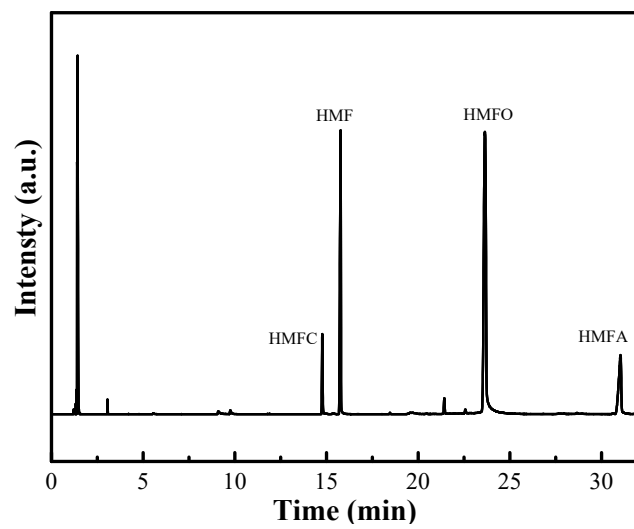

Fig. S2 GC spectra of products.

#### 4. FT-IR spectra of products

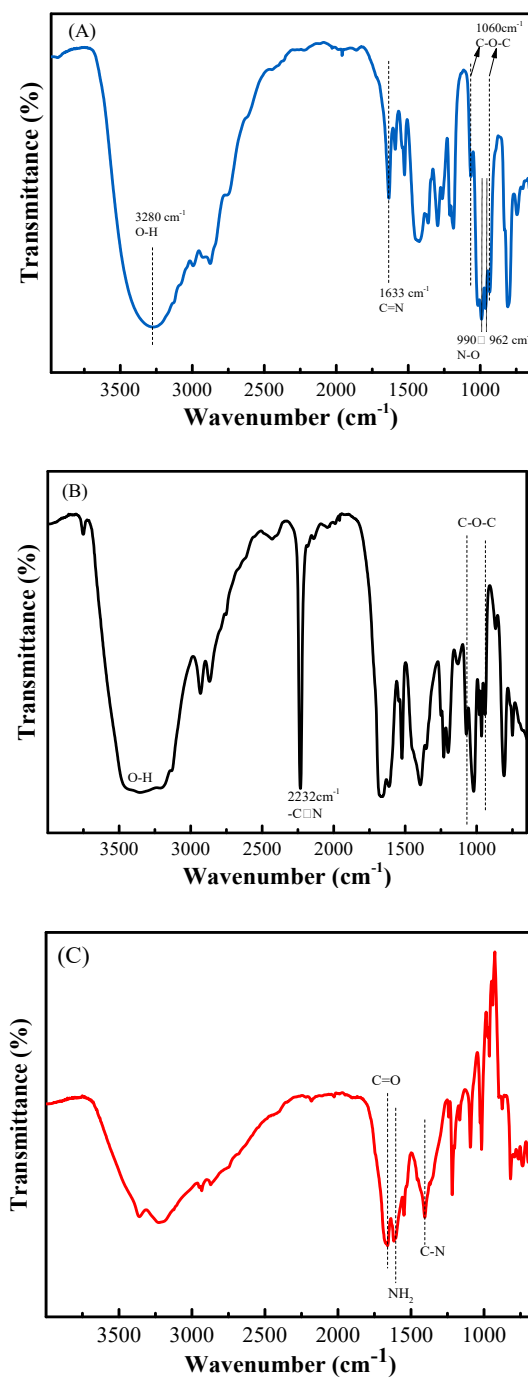

Fig. S3 FT-IR spectra of products: (A)HMFO; (B)HMFC; (C)HMFA.

## 5. NMR spectra of products

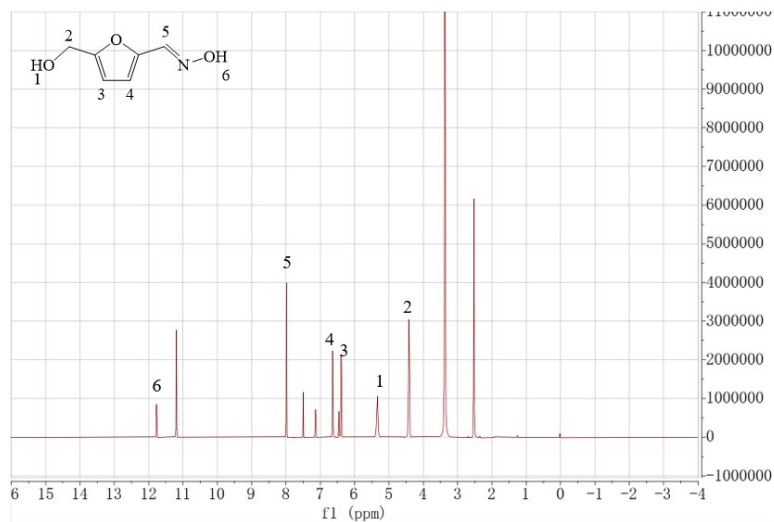

Fig. S4 <sup>1</sup>H NMR of HMFO.

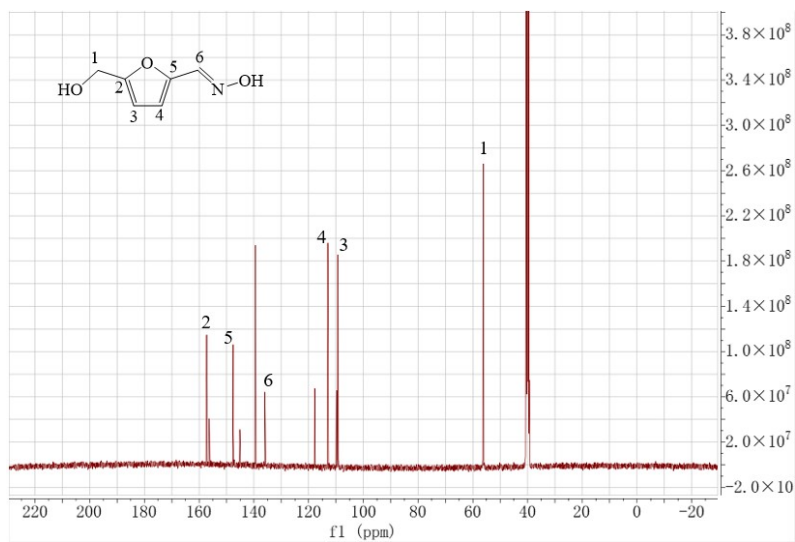

Fig. S5 <sup>13</sup>C NMR of HMFO.

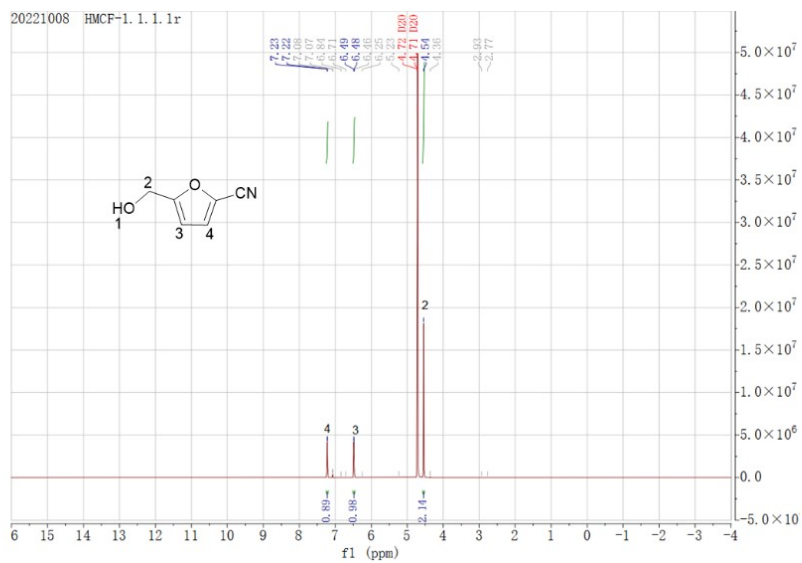

Fig. S6  $^1\text{H}$  NMR of HMFC.

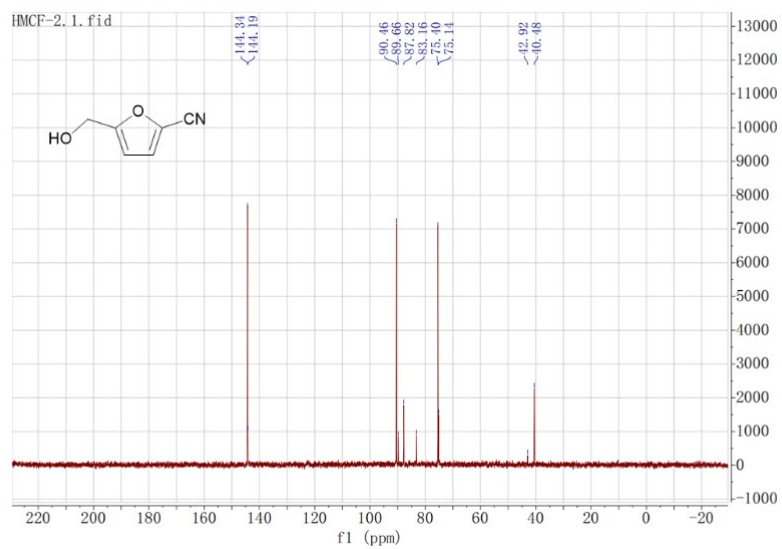

Fig. S7  $^{13}\text{C}$  NMR of HMFC.



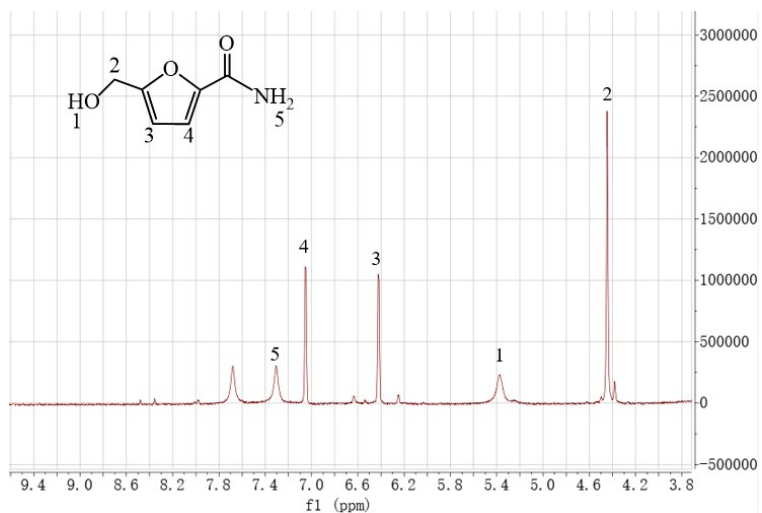

Fig. S8 <sup>1</sup>H NMR of HMFA.

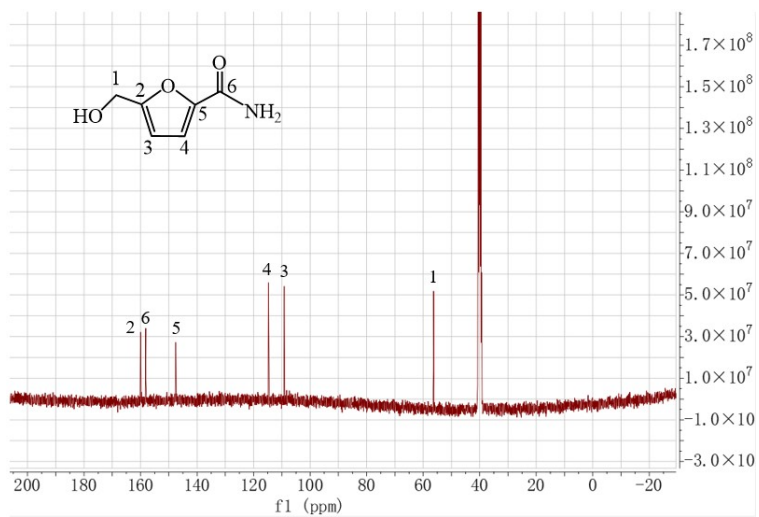

Fig. S9 <sup>13</sup>C NMR of HMFA.

## 6. XRD patterns of catalysts

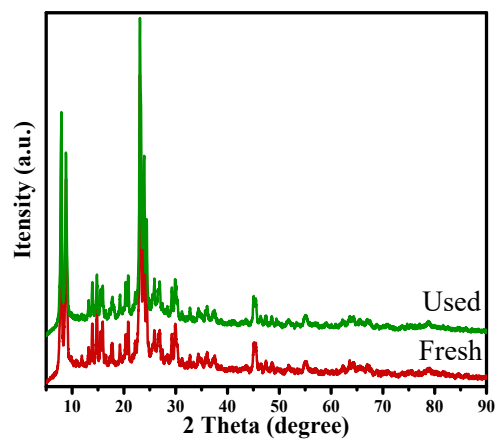

Fig. S10 XRD patterns of the fresh and used Cu(OAc)<sub>2</sub>/TS-1.

## 7. FT-TR spectra of the fresh and used $\text{Cu}(\text{OAc})_2/\text{TS-1}$

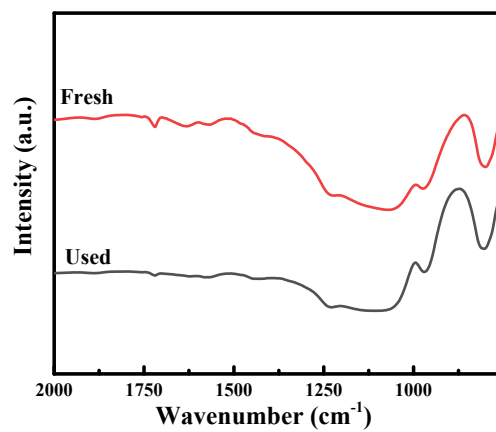

Fig. S11 FT-TR spectra of the fresh and used  $\text{Cu}(\text{OAc})_2/\text{TS-1}$ .

## 8. Pore size distribution of $\text{Cu}(\text{OAc})_2/\text{TS-1}$ and TS-1

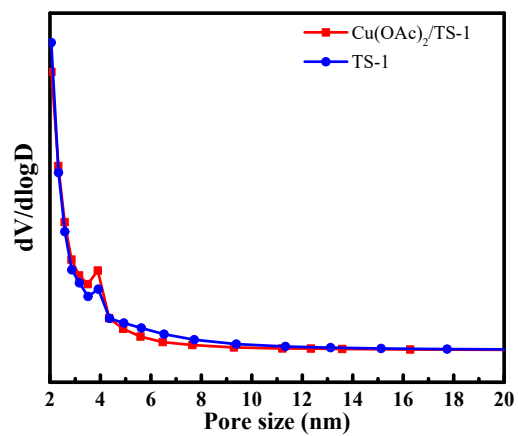

Fig. S12 Pore size distribution of  $\text{Cu}(\text{OAc})_2/\text{TS-1}$  and TS-1.

9. Catalytic performance for the synthesis of HMFA from HMFO over 10%Cu(OAc)<sub>2</sub>/TS-1

Table S1 Catalytic performance for the synthesis of HMFA from HMFO over 10%Cu(OAc)<sub>2</sub>/TS-1

| Entry | Conditions                                        | X <sub>HMFO</sub> / % | Y <sub>HMFA</sub> / % | Y <sub>HMFC</sub> / % |
|-------|---------------------------------------------------|-----------------------|-----------------------|-----------------------|
| 1     | Isopropanol (10 mL), 2 h                          | 12.5                  | 0                     | 12.5                  |
| 2     | Isopropanol (10 mL)+ acetonitrile (0.1 mmol), 1 h | 84.9                  | 62.6                  | 21.7                  |

Reaction conditions: HMFO 1 mmol, 10%Cu(OAc)<sub>2</sub>/TS-1 0.25 mmol, 95 °C.

## 10. The physicochemical property of Cu(OAc)<sub>2</sub>/TS-1 and TS-1

Table S2 The physicochemical property of Cu(OAc)<sub>2</sub>/TS-1 and TS-1.

| Sample                     | S <sub>BET</sub> (m <sup>2</sup> g <sup>-1</sup> ) | V pore (cm <sup>3</sup> g <sup>-1</sup> ) | D pore (nm) |
|----------------------------|----------------------------------------------------|-------------------------------------------|-------------|
| TS-1                       | 475.1113                                           | 0.173274                                  | 6.8356      |
| Cu(OAc) <sub>2</sub> /TS-1 | 359.4973                                           | 0.149491                                  | 6.2599      |

## 11. ICP results and catalytic activity of 10%Cu(OAc)<sub>2</sub>/TS-1

Table S3 ICP results and catalytic activity of 10%Cu(OAc)<sub>2</sub>/TS-1.

| Catalyst | ICP Cu content (%) | Cu(OAc) <sub>2</sub> content (%) | X <sub>HMFO</sub> / % | Y <sub>HMFC</sub> / % |
|----------|--------------------|----------------------------------|-----------------------|-----------------------|
| Fresh    | 3.11               | 9.77                             | 100                   | 92.8                  |

## 12. Reaction performance comparison of different methods for the synthesis of HMFC

Table S4 Reaction performance comparison of different methods for the synthesis of HMFC.

| No. | Catalyst                      | Conditions                                                                                                                   | Conversion (%) | HMFC Yield (%) | Ref.      |
|-----|-------------------------------|------------------------------------------------------------------------------------------------------------------------------|----------------|----------------|-----------|
| 1   | $\beta$ -MnO <sub>2</sub>     | NH <sub>3</sub> aq. (10 equiv), 0.5 MPa O <sub>2</sub> , DMF, 100 °C, 1 h                                                    | 76             | 25             | [11]      |
| 2   | Hac-modified MnO <sub>x</sub> | 120 $\mu$ L NH <sub>3</sub> aq., 0.3 MPa O <sub>2</sub> , CH <sub>3</sub> CN, 60 °C, 3 h                                     | 95             | 87.4           | [12]      |
| 3   | Fe-OMS-2                      | 0.7 mmol (NH <sub>4</sub> ) <sub>2</sub> C <sub>2</sub> O <sub>4</sub> , 0.4 MPa O <sub>2</sub> , Benzonitrile, 105 °C, 12 h | 100            | 98             | [13]      |
| 4   | ZnCl <sub>2</sub>             | NH <sub>2</sub> OH (1.5 equiv), Methanol, 55 °C, 30 min                                                                      | 100            | 65.6           | [18]      |
| 5   | ZnCl <sub>2</sub>             | ZnCl <sub>2</sub> ·2NH <sub>2</sub> OH (0.75 equiv), Methanol, 100 °C, 20 min                                                | 100            | 100            | [18]      |
| 6   | Cu(OAc) <sub>2</sub> /TS-1    | CH <sub>3</sub> CN, 60 °C, 3 h                                                                                               | 100            | 92.8           | This work |
